# Supplementary material for: Metabolomics Profiles Alterations in Cigarette Smokers and Heated Tobacco Product Users
Source: PubMed Central journal article supplement (PMC11330708; doi:10.2188/jea.je20230170), 2024-09-05
Supplement: je-34-403-s001.pdf [file je-34-403-s001.pdf]

|    |             |                        |      |         |      |         |      |         |      |         |      |         |      |         |      |         |      |         |             |                        |
|----|-------------|------------------------|------|---------|------|---------|------|---------|------|---------|------|---------|------|---------|------|---------|------|---------|-------------|------------------------|
| 56 | HMDB0000271 | Sarcosine              | 1.07 | 2.3E-02 | 1.05 | 1.0E-01 | 1.00 | 9.3E-01 | 0.99 | 8.4E-01 | 1.11 | 5.6E-02 | 1.11 | 7.9E-02 | 0.99 | 9.1E-01 | 0.99 | 8.9E-01 | HMDB0000271 | Sarcosine              |
| 57 | HMDB0001539 | ADMA                   | 1.05 | 7.9E-02 | 1.05 | 1.0E-01 | 1.02 | 5.8E-01 | 1.02 | 5.7E-01 | 1.12 | 3.9E-02 | 1.11 | 7.6E-02 | 1.03 | 4.9E-01 | 1.04 | 6.0E-01 | HMDB0001539 | ADMA                   |
| 58 | HMDB0000126 | Glycerophosphate       | 0.98 | 5.5E-01 | 0.96 | 1.0E-01 | 1.03 | 2.9E-01 | 1.00 | 9.3E-01 | 0.93 | 7.2E-02 | 0.91 | 2.3E-02 | 1.01 | 9.4E-01 | 1.01 | 9.0E-01 | HMDB0000126 | Glycerophosphate       |
| 59 | HMDB0000929 | Trp                    | 1.02 | 1.2E-03 | 1.01 | 1.2E-01 | 1.00 | 7.9E-01 | 0.99 | 5.3E-01 | 1.05 | 2.2E-04 | 1.02 | 8.2E-02 | 1.01 | 2.2E-01 | 1.00 | 9.9E-01 | HMDB0000929 | Trp                    |
| 60 | HMDB0000699 | 1-Methylnicotinamide   | 1.08 | 8.4E-02 | 1.07 | 1.4E-01 | 1.05 | 4.2E-01 | 1.02 | 7.8E-01 | 0.90 | 1.9E-01 | 0.86 | 5.0E-02 | 0.96 | 5.5E-01 | 0.92 | 4.4E-01 | HMDB0000699 | 1-Methylnicotinamide   |
| 61 | HMDB0000208 | 2-Oxoglutarate         | 1.00 | 9.4E-01 | 0.98 | 1.7E-01 | 1.03 | 7.3E-02 | 1.01 | 7.5E-01 | 0.99 | 7.1E-01 | 0.99 | 7.5E-01 | 1.02 | 7.7E-01 | 1.01 | 9.0E-01 | HMDB0000208 | 2-Oxoglutarate         |
| 62 | HMDB0000847 | Pelargonate            | 1.02 | 2.3E-01 | 1.02 | 1.7E-01 | 1.01 | 4.5E-01 | 1.01 | 5.7E-01 | 1.00 | 1.0E+00 | 1.01 | 7.7E-01 | 1.01 | 9.4E-01 | 1.01 | 9.0E-01 | HMDB0000847 | Pelargonate            |
| 63 | HMDB0000201 | o-Acetylcarnitine      | 1.07 | 9.1E-02 | 1.06 | 1.7E-01 | 1.08 | 7.1E-02 | 1.04 | 4.7E-01 | 0.97 | 7.5E-01 | 0.98 | 7.9E-01 | 1.03 | 5.8E-01 | 1.02 | 8.9E-01 | HMDB0000201 | o-Acetylcarnitine      |
| 64 | HMDB0000925 | Trimethylamine N-oxide | 0.94 | 1.8E-01 | 0.94 | 1.9E-01 | 0.96 | 4.6E-01 | 0.95 | 4.7E-01 | 1.03 | 7.5E-01 | 1.01 | 8.8E-01 | 1.12 | 4.1E-02 | 1.09 | 3.9E-01 | HMDB0000925 | Trimethylamine N-oxide |
| 65 | HMDB0000159 | Phe                    | 1.00 | 9.2E-01 | 1.01 | 2.1E-01 | 1.00 | 6.1E-01 | 0.99 | 4.7E-01 | 1.02 | 5.6E-02 | 1.02 | 1.3E-01 | 1.01 | 2.3E-01 | 1.01 | 7.8E-01 | HMDB0000159 | Phe                    |
| 66 | HMDB0000192 | Cystine                | 0.98 | 1.2E-02 | 0.99 | 2.1E-01 | 1.00 | 5.8E-01 | 1.00 | 6.5E-01 | 1.00 | 8.0E-01 | 0.99 | 6.7E-01 | 1.00 | 8.3E-01 | 0.99 | 5.9E-01 | HMDB0000192 | Cystine                |
| 67 | HMDB0000479 | 3-Methylhistidine      | 0.96 | 6.8E-02 | 0.97 | 2.4E-01 | 0.96 | 1.5E-01 | 0.96 | 2.7E-01 | 0.94 | 1.9E-01 | 0.95 | 2.8E-01 | 0.99 | 8.3E-01 | 0.99 | 8.9E-01 | HMDB0000479 | 3-Methylhistidine      |
| 68 | HMDB0000883 | Val                    | 1.00 | 8.6E-01 | 1.01 | 2.4E-01 | 1.00 | 7.0E-01 | 0.99 | 4.7E-01 | 1.02 | 8.7E-02 | 1.01 | 2.7E-01 | 1.01 | 2.2E-01 | 1.00 | 8.9E-01 | HMDB0000883 | Val                    |
| 69 | HMDB0000064 | Creatine               | 1.01 | 7.9E-01 | 0.97 | 2.4E-01 | 0.99 | 7.0E-01 | 0.96 | 1.8E-01 | 0.99 | 7.2E-01 | 0.98 | 4.8E-01 | 0.96 | 8.5E-02 | 0.94 | 4.2E-02 | HMDB0000064 | Creatine               |
| 70 | HMDB0000134 | Fumarate               | 0.98 | 5.8E-01 | 0.97 | 2.7E-01 | 1.05 | 1.0E-01 | 1.04 | 4.6E-01 | 1.03 | 5.4E-01 | 1.04 | 4.3E-01 | 0.99 | 9.4E-01 | 1.00 | 9.4E-01 | HMDB0000134 | Fumarate               |
| 71 | HMDB0000731 | Cysteine S-sulfate     | 0.96 | 2.9E-01 | 0.96 | 2.7E-01 | 0.98 | 5.8E-01 | 0.98 | 7.5E-01 | 1.11 | 9.8E-02 | 1.10 | 1.8E-01 | 1.07 | 3.3E-01 | 1.07 | 6.2E-01 | HMDB0000731 | Cysteine S-sulfate     |
| 72 | HMDB0000510 | alpha-Aminoadipate     | 0.96 | 1.6E-01 | 0.97 | 2.7E-01 | 1.00 | 9.3E-01 | 0.99 | 8.0E-01 | 1.00 | 9.4E-01 | 0.97 | 6.3E-01 | 1.04 | 4.5E-01 | 1.01 | 8.9E-01 | HMDB0000510 | alpha-Aminoadipate     |
| 73 | HMDB0000190 | Lactate                | 1.03 | 2.2E-02 | 1.01 | 2.9E-01 | 1.03 | 2.6E-02 | 1.01 | 7.2E-01 | 1.04 | 1.3E-01 | 1.04 | 1.6E-01 | 1.00 | 9.4E-01 | 1.00 | 9.0E-01 | HMDB0000190 | Lactate                |
| 74 | HMDB0000251 | Taurine                | 0.99 | 4.2E-01 | 0.99 | 3.0E-01 | 0.99 | 5.8E-01 | 1.00 | 8.0E-01 | 1.01 | 5.1E-01 | 1.00 | 8.4E-01 | 1.01 | 3.8E-01 | 1.01 | 5.9E-01 | HMDB0000251 | Taurine                |
| 75 | HMDB0000641 | Gln                    | 0.99 | 3.0E-02 | 1.01 | 3.4E-01 | 0.98 | 6.0E-04 | 1.00 | 6.5E-01 | 1.01 | 6.5E-01 | 1.01 | 2.8E-01 | 0.99 | 4.8E-02 | 0.99 | 5.4E-01 | HMDB0000641 | Gln                    |
| 76 | HMDB0032538 | Triethanolamine        | 1.03 | 6.4E-01 | 1.05 | 3.9E-01 | 1.04 | 5.8E-01 | 1.05 | 5.7E-01 | 0.95 | 7.2E-01 | 0.97 | 7.7E-01 | 0.95 | 4.9E-01 | 0.95 | 7.8E-01 | HMDB0032538 | Triethanolamine        |
| 77 | HMDB0003334 | SDMA                   | 0.97 | 2.1E-01 | 0.98 | 4.4E-01 | 0.98 | 5.8E-01 | 0.99 | 8.0E-01 | 0.93 | 1.9E-01 | 0.92 | 1.7E-01 | 1.00 | 9.7E-01 | 1.00 | 9.9E-01 | HMDB0003334 | SDMA                   |
| 78 | HMDB0000812 | N-Acetylaspartate      | 0.99 | 6.3E-01 | 0.99 | 4.9E-01 | 0.99 | 7.1E-01 | 0.99 | 7.8E-01 | 1.01 | 8.7E-01 | 1.01 | 7.1E-01 | 1.01 | 9.4E-01 | 1.02 | 9.0E-01 | HMDB0000812 | N-Acetylaspartate      |
| 79 | HMDB0000289 | Urate                  | 1.00 | 9.3E-01 | 0.99 | 4.9E-01 | 1.04 | 8.3E-05 | 1.02 | 7.9E-02 | 1.04 | 8.3E-02 | 1.01 | 7.6E-01 | 1.06 | 8.0E-05 | 1.03 | 4.4E-01 | HMDB0000289 | Urate                  |
| 80 | HMDB0000193 | Isocitrate             | 1.01 | 4.0E-01 | 1.01 | 5.7E-01 | 1.04 | 2.1E-03 | 1.02 | 2.6E-01 | 1.00 | 9.7E-01 | 1.01 | 7.6E-01 | 1.02 | 4.3E-01 | 1.02 | 7.6E-01 | HMDB0000193 | Isocitrate             |
| 81 | HMDB0061881 | 4-Acetylbutyrate       | 1.03 | 5.5E-01 | 1.03 | 5.8E-01 | 1.01 | 7.1E-01 | 1.02 | 7.5E-01 | 1.04 | 6.4E-01 | 1.02 | 7.6E-01 | 1.01 | 9.4E-01 | 1.01 | 9.0E-01 | HMDB0061881 | 4-Acetylbutyrate       |
| 82 | HMDB0000784 | Azelate                | 1.01 | 7.5E-01 | 1.01 | 5.8E-01 | 1.01 | 7.4E-01 | 1.01 | 7.5E-01 | 1.03 | 3.7E-01 | 1.03 | 5.3E-01 | 1.00 | 9.4E-01 | 1.01 | 9.0E-01 | HMDB0000784 | Azelate                |
| 83 | HMDB0000127 | Glucuronate            | 1.00 | 9.1E-01 | 1.02 | 5.8E-01 | 1.02 | 5.0E-01 | 1.01 | 7.5E-01 | 1.06 | 2.5E-01 | 1.05 | 4.3E-01 | 1.03 | 7.7E-01 | 1.02 | 9.0E-01 | HMDB0000127 | Glucuronate            |
| 84 | HMDB0000097 | Choline                | 1.02 | 5.4E-02 | 1.00 | 6.0E-01 | 1.01 | 2.6E-01 | 1.00 | 8.0E-01 | 1.02 | 1.2E-01 | 1.02 | 3.4E-01 | 1.01 | 4.0E-01 | 1.00 | 8.9E-01 | HMDB0000097 | Choline                |
| 85 | HMDB0000696 | Met                    | 1.00 | 7.9E-01 | 1.01 | 6.4E-01 | 0.99 | 5.8E-01 | 0.99 | 5.1E-01 | 1.04 | 8.7E-02 | 1.03 | 2.2E-01 | 1.01 | 6.9E-01 | 1.00 | 8.9E-01 | HMDB0000696 | Met                    |
| 86 | HMDB0000482 | Octanoate              | 0.99 | 7.7E-01 | 0.98 | 6.5E-01 | 1.00 | 9.5E-01 | 1.00 | 9.3E-01 | 0.91 | 8.9E-02 | 0.93 | 2.6E-01 | 1.00 | 9.4E-01 | 1.02 | 9.0E-01 | HMDB0000482 | Octanoate              |
| 87 | HMDB0000118 | Homovanillate          | 1.05 | 3.1E-01 | 1.02 | 6.8E-01 | 1.09 | 3.5E-02 | 1.06 | 3.3E-01 | 1.03 | 7.1E-01 | 1.00 | 9.8E-01 | 1.00 | 9.9E-01 | 0.98 | 9.0E-01 | HMDB0000118 | Homovanillate          |
| 88 | HMDB0000763 | Indole-3-acetate       | 1.00 | 9.0E-01 | 0.99 | 6.8E-01 | 1.00 | 9.3E-01 | 0.99 | 8.0E-01 | 0.98 | 7.8E-01 | 0.95 | 5.4E-01 | 1.04 | 4.9E-01 | 1.04 | 7.7E-01 | HMDB0000763 | Indole-3-acetate       |
| 89 | HMDB0000661 | Glutarate              | 0.98 | 4.3E-01 | 0.99 | 8.1E-01 | 1.01 | 6.8E-01 | 1.01 | 7.2E-01 | 0.96 | 2.8E-01 | 1.00 | 9.9E-01 | 0.99 | 9.4E-01 | 1.01 | 9.0E-01 | HMDB0000661 | Glutarate              |
| 90 | HMDB0000691 | Malonate               | 1.00 | 9.6E-01 | 0.99 | 8.2E-01 | 0.99 | 8.8E-01 | 0.99 | 8.5E-01 | 1.05 | 5.2E-01 | 1.05 | 5.3E-01 | 1.01 | 9.4E-01 | 1.02 | 9.0E-01 | HMDB0000691 | Malonate               |
| 91 | HMDB0000267 | 5-Oxoprolin            | 0.99 | 4.3E-01 | 1.00 | 8.2E-01 | 0.99 | 3.2E-01 | 1.00 | 9.3E-01 | 1.03 | 5.7E-02 | 1.04 | 2.0E-02 | 1.01 | 7.7E-01 | 1.02 | 7.6E-01 | HMDB0000267 | 5-Oxoprolin            |
| 92 | HMDB0000714 | Hippurate              | 0.94 | 5.2E-01 | 0.98 | 8.2E-01 | 0.85 | 3.5E-02 | 0.93 | 5.7E-01 | 0.95 | 7.1E-01 | 0.96 | 7.6E-01 | 0.98 | 9.4E-01 | 1.02 | 9.0E-01 | HMDB0000714 | Hippurate              |
| 93 | HMDB0000666 | Heptanoate             | 0.97 | 4.3E-01 | 0.99 | 8.3E-01 | 0.97 | 4.5E-01 | 0.98 | 7.5E-01 | 0.99 | 8.8E-01 | 0.97 | 7.6E-01 | 0.94 | 5.3E-01 | 0.93 | 6.2E-01 | HMDB0000666 | Heptanoate             |
| 94 | HMDB0000535 | Hexanoate              | 0.99 | 6.4E-01 | 1.00 | 8.7E-01 | 0.98 | 2.1E-01 | 0.98 | 5.7E-01 | 0.93 | 7.1E-03 | 0.93 | 2.0E-02 | 0.99 | 9.4E-01 | 0.99 | 9.0E-01 | HMDB0000535 | Hexanoate              |

FDR, false discovery rate.

**eTable 2.** Characteristics of the participants at the follow-up survey after matching

|                                            | HTP users            | Cigarette smokers     | Past smokers         | Never smokers        |
|--------------------------------------------|----------------------|-----------------------|----------------------|----------------------|
| N, %                                       | 55 (11.9)            | 119 (25.7)            | 144 (31.1)           | 145 (31.3)           |
| Women, n (%)                               | 10 (18.2)            | 27 (22.7)             | 30 (20.7)            | 30 (20.7)            |
| Age, mean (SD)                             | 49.22<br>(10.57)     | 54.51 (8.83)          | 52.72<br>(10.25)     | 51.34<br>(10.08)     |
| Total tobacco products<br>number per day   | 13.12 (4.82)         | 14.41 (6.23)          |                      |                      |
| Cigarette, mean (SD)                       |                      | 14.41 (6.23)          |                      |                      |
| IQOS, mean (SD)                            | 11.05 (6.41)         |                       |                      |                      |
| Ploom TECH, mean<br>(SD)                   | 0.27 (2.02)          |                       |                      |                      |
| glo, mean (SD)                             | 1.80 (5.06)          |                       |                      |                      |
| Years of using HTPs                        | 1.69 (0.84)          |                       |                      |                      |
| Cigarette number per<br>day<br>at baseline | 15.49 (6.14)         | 16.08 (6.80)          |                      |                      |
| Years of smoking                           | 27.47<br>(10.94)     | 33.00<br>(10.23)      | 23.25<br>(15.10)     |                      |
| Years after cessation                      |                      |                       | 8.77 (7.65)          |                      |
| Daily drinking, %                          | 42 (76.4)            | 90 (75.6)             | 104 (72.2)           | 108 (74.5)           |
| Systolic blood pressure,<br>mean (SD)      | 128.93<br>(17.56)    | 129.93<br>(17.99)     | 131.51<br>(16.44)    | 128.61<br>(15.80)    |
| BMI, mean (SD)                             | 23.00 (3.03)         | 23.05 (3.75)          | 23.77 (3.66)         | 23.86 (3.61)         |
| HbA1c, mean (SD)                           | 5.66 (0.60)          | 5.71 (0.47)           | 5.75 (0.59)          | 5.66 (0.56)          |
| Triglyceride, median<br>(IQR]              | 94.0<br>(58.0–134.5) | 108.0<br>(79.5–146.5) | 92.0<br>(65.8–144.3) | 95.0<br>(62.0–132.0) |

HTP, heated tobacco products; IQR, interquartile range; SD, standard deviation.

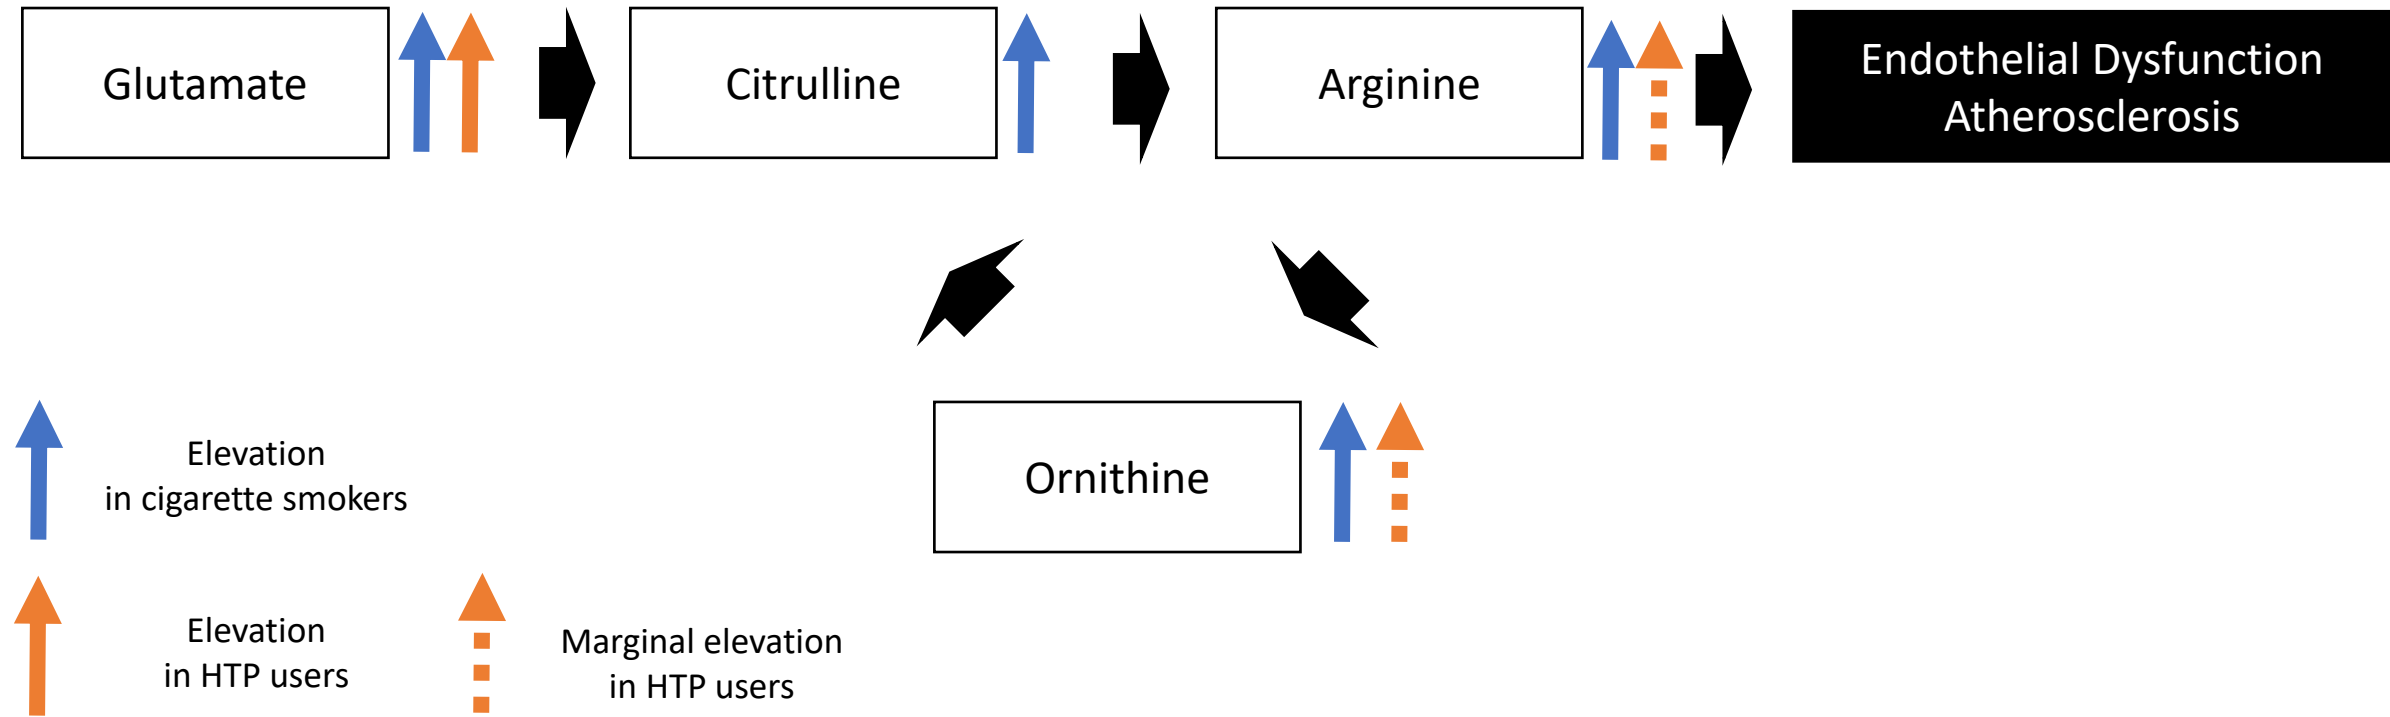

**eFigure 1. Glutamate pathway and atherosclerosis development in smokers.**

Previous studies reported that the glutamate transporter encoded by SLC7A11 was activated in cigarette smokers, which increased circulating glutamate, arginine, ornithine, and citrulline.<sup>23,24</sup> In our study, the elevation of these metabolites was confirmed. Previous studies have suggested that elevation of this metabolic pathway can be linked to endothelial cell damage through nitric oxide decline and contribute to atherosclerosis.<sup>25-27</sup>
